# Supplementary material
Source: publisher figshare collection journal article supplement (https://acs.figshare.com/ndownloader/files/5518364)
Supplement: Supplementary file 1 [file 5518364]

# Supporting Information for “*Ab Initio* Force Fields for Imidazolium-Based Ionic Liquids.”

Jesse G. McDaniel,<sup>†</sup> Eunsong Choi,<sup>‡</sup> Chang Yun Son,<sup>†</sup> J. R. Schmidt,<sup>†</sup> and Arun  
Yethiraj<sup>\*,†</sup>

*Department of Chemistry, University of Wisconsin, Madison, Wisconsin, 53706, and Department  
of Physics, University of Wisconsin, Madison, Wisconsin, 53706*

E-mail: yethiraj@chem.wisc.edu

---

\*To whom correspondence should be addressed

<sup>†</sup>Department of Chemistry, University of Wisconsin, Madison, Wisconsin, 53706

<sup>‡</sup>Department of Physics, University of Wisconsin, Madison, Wisconsin, 53706

# S1 Force Field Parameters

In Table S1, we give a comprehensive list of parameters used to describe the non-bonded interactions in all of the ionic liquids studied in this work. We note that for the exponential repulsive terms, the coefficients  $A_{ij}^{tot}$  result from a sum of like atom-type coefficients describing exchange, electrostatic, induction, and dhf interactions (see reference ).

$$A_{ij}^{tot} = A_{ij}^{exch} + A_{ij}^{elec} + A_{ij}^{ind} + A_{ij}^{dhf}$$

All cross-interactions are treated using the following combination rules:

$$|A_{ij}^{type}| = (A_i^{type} A_j^{type})^{1/2}$$

$$B_{ij} = (B_i + B_j) \frac{B_i B_j}{B_i^2 + B_j^2}$$

$$C_n^{ij} = \sqrt{C_n^i C_n^j}$$

Where the sign of  $A_{ij}^{type}$  is strictly positive for exchange, and strictly negative for electrostatics, induction, and dhf.

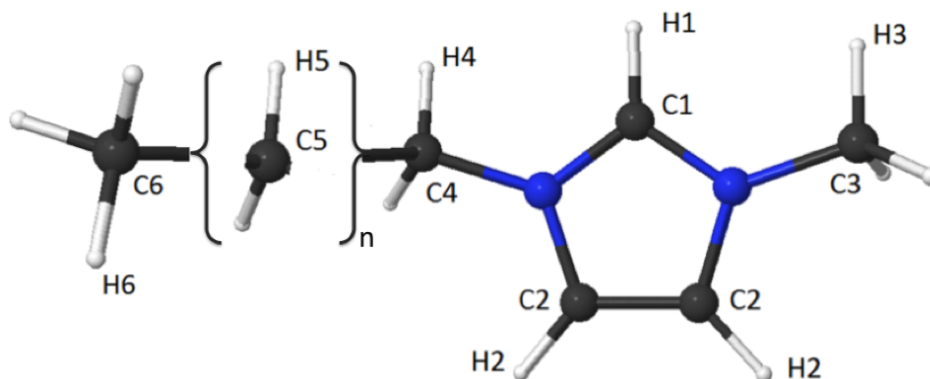

Figure S1: Atom labels for EMIM<sup>+</sup>, BMIM<sup>+</sup>, and C<sub>6</sub>MIM<sup>+</sup>, where the number of C5 carbon atoms is n=0, n=2, and n=4 respectively.

## S1.1 Non-Bonded Parameters

**Table S1: Non-bonded force field parameters. Atom types are depicted in Figure S1. Units are as follows:  $A_{exch}$ ,  $A_{elec}$ ,  $A_{ind}$ , and  $A_{dhf}$  are in kJ/mol;  $B$  are in  $\text{\AA}^{-1}$ ;  $C_6$  are in  $\text{kJ}/(\text{mol}\cdot\text{\AA}^{-6})$ ,  $C_8$  are in  $\text{kJ}/(\text{mol}\cdot\text{\AA}^{-8})$ ,  $C_{10}$  are in  $\text{kJ}/(\text{mol}\cdot\text{\AA}^{-10})$ ,  $C_{12}$  are in  $\text{kJ}/(\text{mol}\cdot\text{\AA}^{-12})$ , polarizabilities ( $\alpha$ ) are in  $\text{\AA}^3$ .**

| Atom type | $A_{exch}$ | $A_{elec}$ | $A_{ind}$ | $A_{dhf}$ | $B$    |
|-----------|------------|------------|-----------|-----------|--------|
| N         | 252624.4   | 102233.5   | 0.0       | 17537.3   | 3.9061 |
| C1        | 422654.8   | 198880.5   | 0.0       | 39863.4   | 3.4384 |
| C2        | 422654.8   | 198880.5   | 0.0       | 39863.4   | 3.4384 |
| C3        | 304938.7   | 117598.0   | 11.7      | 2837.1    | 3.4384 |
| C4        | 304938.7   | 117598.0   | 11.7      | 2837.1    | 3.4384 |
| C5        | 304938.7   | 117598.0   | 11.7      | 2837.1    | 3.4384 |
| C6        | 304938.7   | 117598.0   | 11.7      | 2837.1    | 3.4384 |
| H1        | 5241.8     | 305.2      | 0.0       | 540.4     | 3.7776 |
| H2        | 5241.8     | 305.2      | 0.0       | 540.4     | 3.7776 |
| H3        | 15986.7    | 3623.5     | 746.7     | 1467.9    | 3.7776 |
| H4        | 15986.7    | 3623.5     | 746.7     | 1467.9    | 3.7776 |
| H5        | 15986.7    | 3623.5     | 746.7     | 1467.9    | 3.7776 |
| H6        | 15986.7    | 3623.5     | 746.7     | 1467.9    | 3.7776 |
| B         | 11862.8    | 0.0        | 0.0       | 0.0       | 2.9518 |
| P         | 0.0        | 0.0        | 0.0       | 0.0       | 3.3184 |
| F         | 180128.4   | 80998.3    | 0.0       | 13995.8   | 3.5961 |

| Atom type | $C_6$  | $C_8$   | $C_{10}$ | $C_{12}$ | $\alpha$ |
|-----------|--------|---------|----------|----------|----------|
| N         | 1018.7 | 6246.0  | 92197.5  | 676941.7 | 1.047    |
| C1        | 1414.9 | 6158.8  | 94108.3  | 505703.4 | 1.953    |
| C2        | 1414.9 | 6158.8  | 94108.3  | 505703.4 | 1.953    |
| C3        | 716.6  | 0.0     | 0.0      | 0.0      | 1.953    |
| C4        | 716.6  | 0.0     | 0.0      | 0.0      | 1.953    |
| C5        | 1354.5 | 5705.0  | 18089.8  | 52097.7  | 1.953    |
| C6        | 1354.5 | 5705.0  | 18089.8  | 52097.7  | 1.953    |
| H1        | 49.4   | 125.1   | 2245.6   | 0.0      | 0.000    |
| H2        | 49.4   | 125.1   | 2245.6   | 0.0      | 0.000    |
| H3        | 129.4  | 679.6   | 4995.3   | 0.0      | 0.000    |
| H4        | 129.4  | 679.6   | 4995.3   | 0.0      | 0.000    |
| H5        | 129.4  | 679.6   | 4995.3   | 0.0      | 0.000    |
| H6        | 129.4  | 679.6   | 4995.3   | 0.0      | 0.000    |
| B         | 973.3  | 5319.1  | 53711.0  | 330184.6 | 0.035    |
| P         | 3582.1 | 30062.5 | 118008.9 | 0.0      | 0.555    |
| F         | 795.3  | 5754.0  | 27552.6  | 85759.4  | 0.932    |

## S1.2 Charges

**Table S2: Cation charges; atom types are depicted in Figure S1.**

| Atom type | EMIM <sup>+</sup> | BMIM <sup>+</sup> | C <sub>6</sub> MIM <sup>+</sup> |
|-----------|-------------------|-------------------|---------------------------------|
| N         | -0.1965           | -0.1915           | -0.2046                         |
| C1        | 0.3197            | 0.3158            | 0.3142                          |
| C2        | -0.0167           | -0.0192           | -0.0186                         |
| C3        | 0.2481            | 0.2316            | 0.2725                          |
| C4        | 0.3189            | 0.2341            | 0.3179                          |
| C5        | N/A               | 0.0616            | 0.0651                          |
| C6        | -0.3067           | -0.0251           | 0.0404                          |
| H1        | 0.0922            | 0.0919            | 0.0921                          |
| H2        | 0.1635            | 0.1644            | 0.1637                          |
| H3        | 0.0291            | 0.0328            | 0.0222                          |
| H4        | 0.0096            | 0.0157            | -0.0106                         |
| H5        | N/A               | -0.0181           | -0.0264                         |
| H6        | 0.1069            | 0.0213            | -0.0043                         |

**Table S3: BF<sub>4</sub><sup>-</sup> charges.**

| Atom type | q       |
|-----------|---------|
| B         | 1.2008  |
| F         | -0.5502 |

**Table S4: PF<sub>6</sub><sup>-</sup> charges**

| Atom type | q       |
|-----------|---------|
| P         | 1.7624  |
| F         | -0.4604 |

## S1.3 Proper Dihedrals

Given in the tables below are the Ryckaert-Belleman parameters (in kJ/mol) describing the proper dihedral potentials for the cation alkyl chains, that were explicitly fit to ab initio calculations. Note as stated in the paper, all alkyl-chain dihedral potentials involving hydrogen atoms are assumed zero, unless explicitly listed otherwise (terminal group).

**Table S5: EMIM<sup>+</sup> proper dihedrals**

| Dihedral type | $C_0$ | $C_1$  | $C_2$  | $C_3$  | $C_4$  | $C_5$  |
|---------------|-------|--------|--------|--------|--------|--------|
| C1-N-C4-C6    | 0.000 | -0.105 | -0.114 | 1.906  | -6.345 | 3.933  |
| C2-N-C4-C6    | 0.000 | 0.105  | -0.114 | -1.906 | -6.345 | -3.933 |
| N-C4-C6-H6    | 0.000 | 18.447 | 19.558 | -7.641 | -4.946 | 0.012  |

**Table S6: BMIM<sup>+</sup> proper dihedrals**

| Dihedral type | $C_0$ | $C_1$  | $C_2$  | $C_3$   | $C_4$  | $C_5$  |
|---------------|-------|--------|--------|---------|--------|--------|
| C1-N-C4-C5    | 0.000 | -2.438 | 1.111  | 3.314   | -1.146 | 0.098  |
| C2-N-C4-C5    | 0.000 | 2.438  | 1.111  | -3.314  | -1.146 | -0.098 |
| N-C4-C5-C5    | 0.000 | 15.411 | 0.638  | -21.200 | 1.871  | -0.704 |
| C4-C5-C5-C6   | 0.000 | 17.570 | -3.260 | -18.734 | 1.725  | -1.516 |
| C5-C5-C6-H6   | 0.000 | 16.880 | -4.247 | -5.037  | 2.274  | -3.638 |

**Table S7: C<sub>6</sub>MIM<sup>+</sup> proper dihedrals**

| Dihedral type | $C_0$ | $C_1$  | $C_2$  | $C_3$  | $C_4$  | $C_5$  |
|---------------|-------|--------|--------|--------|--------|--------|
| C1-N-C4-C5    | 0.000 | -1.516 | -0.028 | 1.405  | -0.377 | 0.413  |
| C2-N-C4-C5    | 0.000 | 1.516  | -0.028 | -1.405 | -0.377 | -0.413 |
| N-C4-C5-C5    | 0.000 | 16.518 | 0.599  | -24.09 | 1.951  | 0.111  |
| C4-C5-C5-C5   | 0.000 | 15.819 | -3.537 | -18.67 | 1.656  | -1.598 |
| C5-C5-C5-C5   | 0.000 | 16.118 | -2.326 | -20.13 | 1.166  | -0.816 |
| C5-C5-C5-C6   | 0.000 | 17.709 | 0.502  | -24.05 | 0.450  | -0.848 |
| C5-C5-C6-H6   | 0.000 | 10.933 | 2.145  | -7.954 | -1.026 | 1.074  |

## S2 Force Field Fits

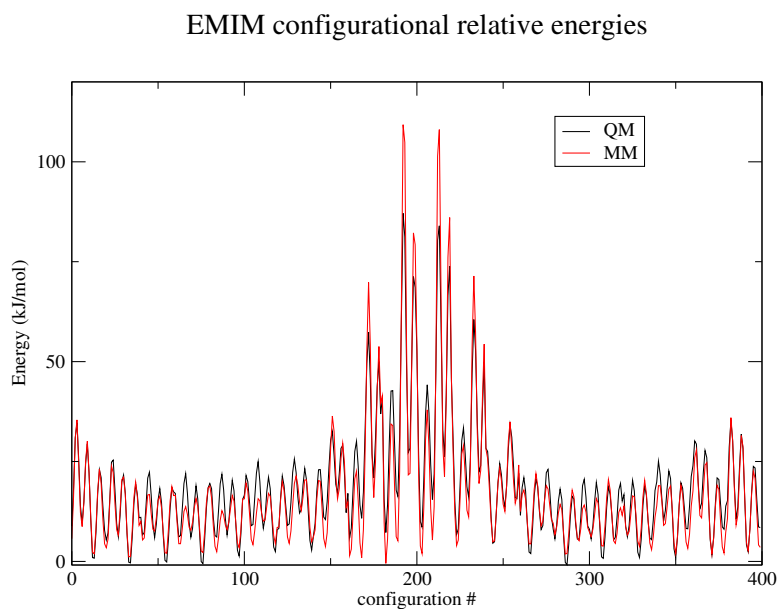

Figure S2: Force field vs ab initio relative energies for configurations sampling different EMIM<sup>+</sup> dihedral distributions

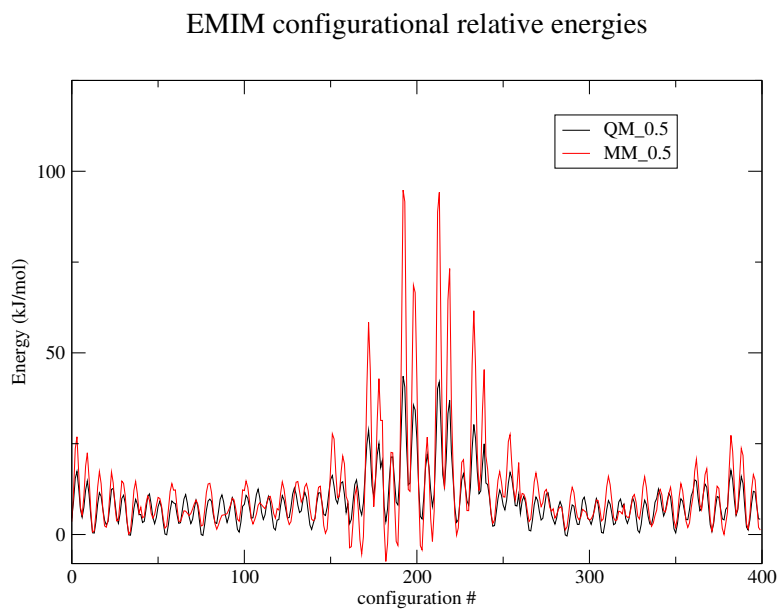

Figure S3: Analogous fit to Figure S2 for the ab initio PES scaled by 0.5

### EMIM configurational relative energies

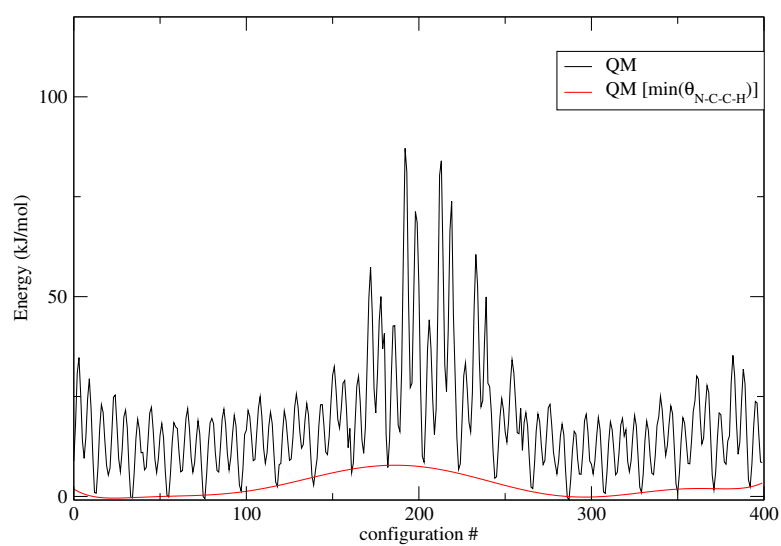

Figure S4: EMIM PES given by  $E(\theta_{C-N-C-C}) = \min_{\theta_{N-C-C-H}} E(\theta_{C-N-C-C}, \theta_{N-C-C-H})$  (red), compared to original *ab initio* surface.

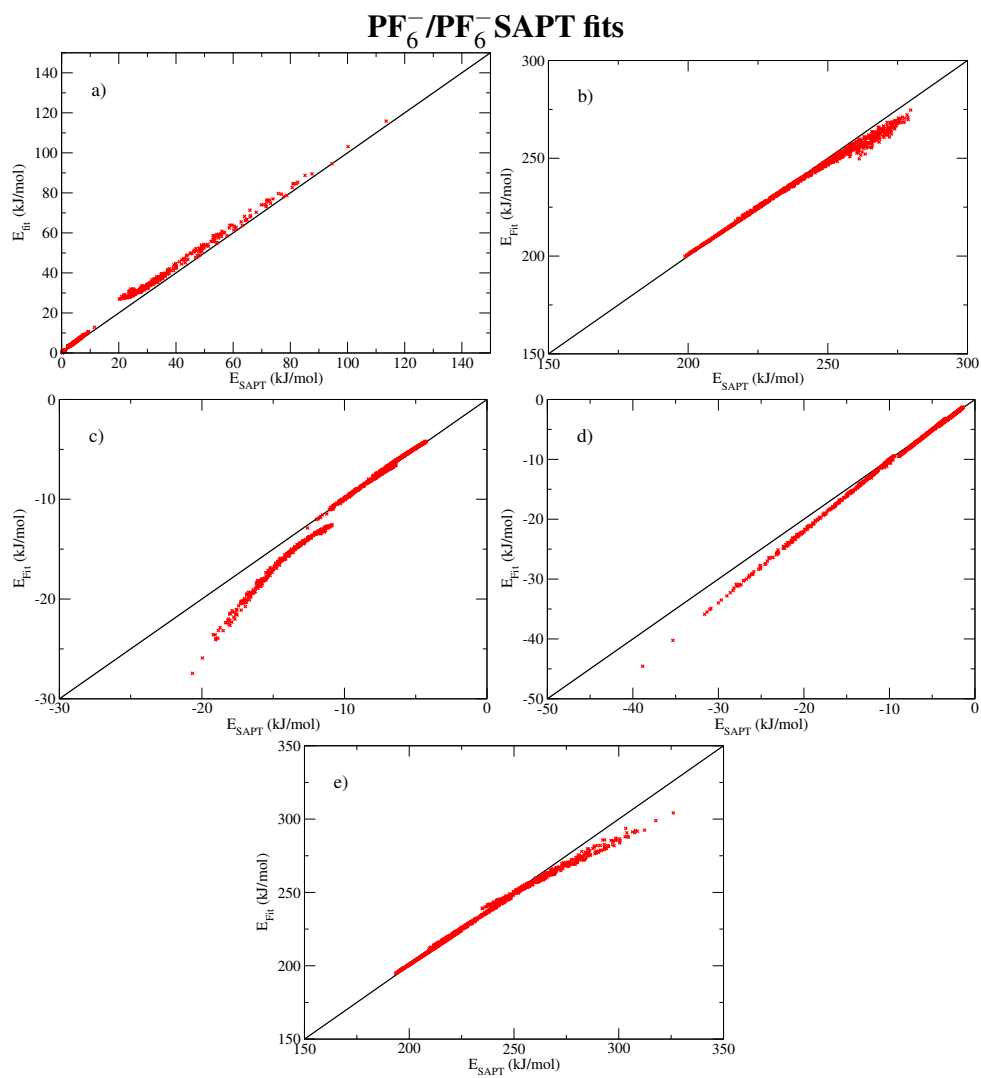

Figure S5: PF<sub>6</sub><sup>-</sup>/PF<sub>6</sub><sup>-</sup> SAPT intermolecular interaction fits: a) exchange, b) electrostatics, c) induction+dhf, d) dispersion, e) total energy.



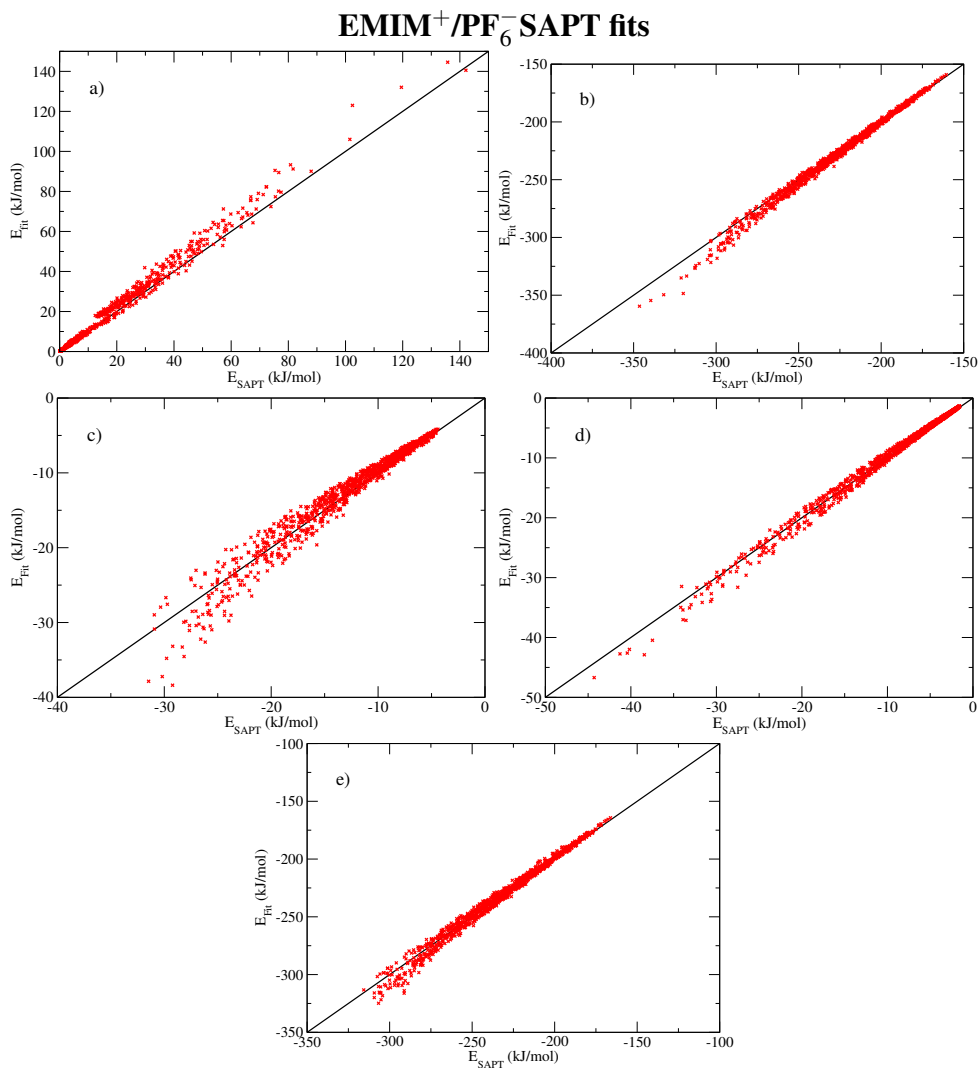

Figure S6: EMIM<sup>+</sup>/PF<sub>6</sub><sup>-</sup> SAPT intermolecular interaction fits: a) exchange, b) electrostatics, c) induction+dhf, d) dispersion, e) total energy.

## S3 Section 3: Thermodynamic properties

### S3.1 System Equilibration

For our MD simulations, we have used a comparatively short simulation time for equilibration in the NPT ensemble (2 ns) compared to the production runs in the NVT ensemble (50 ns). This partitioning of computational effort was chosen for maximal statistics. Here, we demonstrate the sufficiency of the employed equilibration time for the most viscous IL studied, [C<sub>6</sub>MIM<sup>+</sup>][PF<sub>6</sub><sup>-</sup>],

at the lowest temperature, 298 K; all other simulations for different IL/temperature combinations should equilibrate as least as fast. Figure S7(a) shows the density of  $[\text{C}_6\text{MIM}^+][\text{PF}_6^-]$  at 298 K as a function of time for the NPT equilibration simulation. It is clear that the density reaches its equilibrium value extremely rapidly (in the first 100 ps), and subsequently fluctuates about this value. In Figure S7(b), we show various energy components for  $[\text{C}_6\text{MIM}^+][\text{PF}_6^-]$  at 298 K over the 50 ns of the NVT simulation. We do not elaborate on the nature of the decomposition, but it is clear that these distinct energy components as well as the total potential energy of the system do not change over the course of the simulation, indicating that the system was indeed sufficiently equilibrated.

We note that currently employed equilibration times may not be sufficient for ILs composed of longer alkyl-chain cations, such as  $\text{C}_8\text{MIM}^+$ . For such ILs, there exists significant structural heterogeneity involving partitioning into polar and non-polar domains; accurately reproducing this heterogeneity may require longer equilibration times. However, for  $\text{C}_6\text{MIM}^+$  and shorter-chain cations, the structural heterogeneity is much less significant (see for example, Triolo et al. *J. Phys. Chem. B* **2007**, 111, 4641-4644), rendering more rapid equilibration.

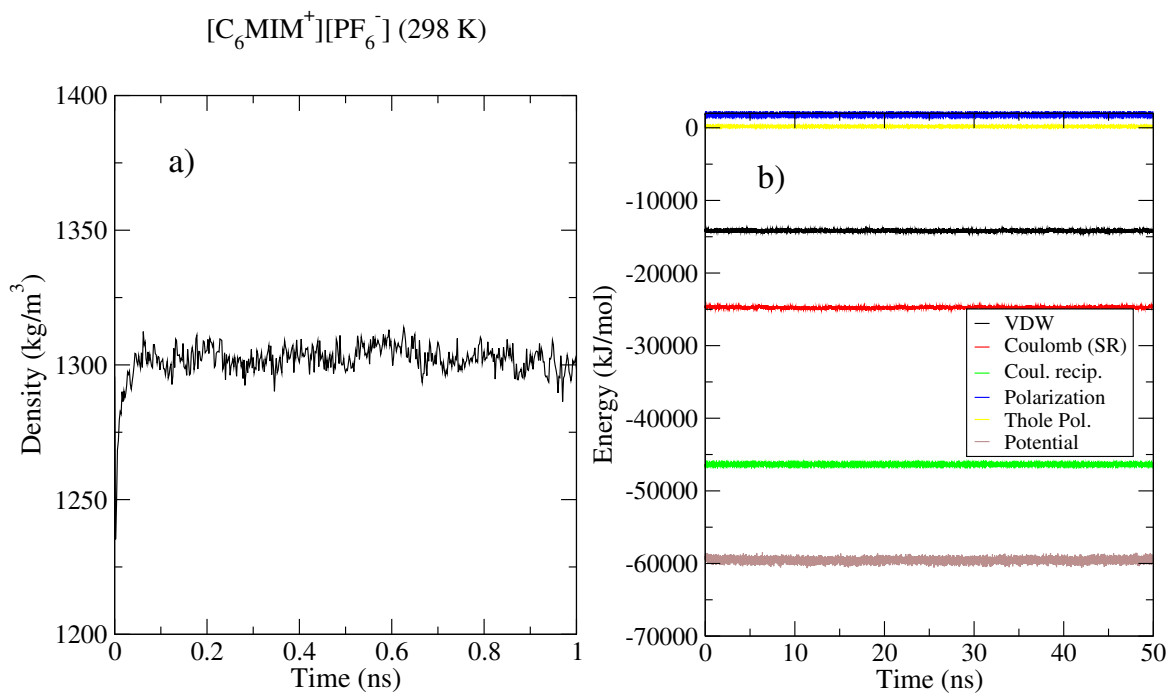

Figure S7: a) Density of  $[\text{C}_6\text{MIM}^+][\text{PF}_6^-]$  at 298K for initial 1 ns of NPT simulation. b) Energy components of  $[\text{C}_6\text{MIM}^+][\text{PF}_6^-]$  at 298K for 50 ns NVT simulation.

### S3.2 $[\text{EMIM}^+][\text{BF}_4^-]$ Dihedral Distributions

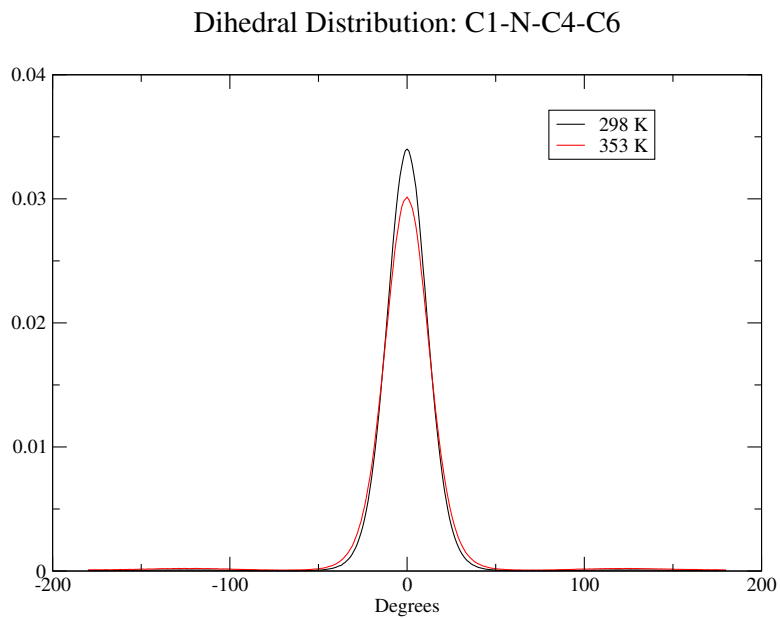

Figure S8: EMIM dihedral distribution for ab initio surface of Figure S2 for  $[\text{EMIM}^+][\text{BF}_4^-]$ .

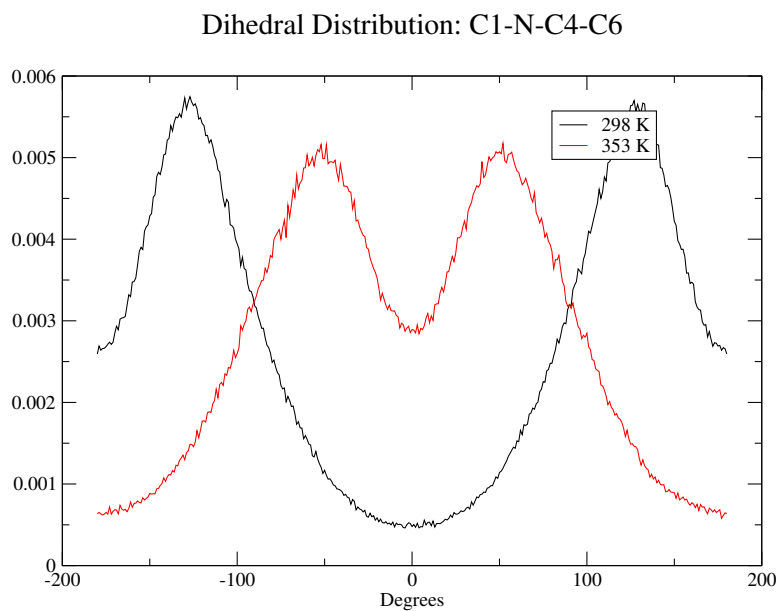

Figure S9: EMIM dihedral distribution for smoothed methyl rotation surface of Figure S4 for  $[\text{EMIM}^+][\text{BF}_4^-]$ .

### S3.3 Liquid Energies

The total potential energy of the IL liquids at 298 K and 353 K are given in Table S8 (these energies are normalized by the number of ion pairs in the liquid). The uncertainty in these values is  $< 1$  kJ/mol, as determined from comparison of the 10 different [BMIM<sup>+</sup>][BF<sub>4</sub><sup>-</sup>] trajectories at 298 K. We note that these energies are not physically significant, as they include intramolecular contributions. Rather the physically significant quantity is the cohesive energy, which subtracts out the individual ion energies (Table S10), as given in the main paper.

**Table S8: Total potential energy of IL liquids, per ion pair. The uncertainty of this data is  $< 1$  kJ/mol. <sup>a</sup> [EMIM<sup>+</sup>][PF<sub>6</sub><sup>-</sup>] is a solid at room temperature.**

| IL                                                                | Energy kJ/mol    |       |
|-------------------------------------------------------------------|------------------|-------|
|                                                                   | 298 K            | 353 K |
| [EMIM <sup>+</sup> ][BF <sub>4</sub> <sup>-</sup> ]               | -310             | -291  |
| [EMIM <sup>+</sup> ][PF <sub>6</sub> <sup>-</sup> ]               | N/A <sup>a</sup> | -275  |
| [BMIM <sup>+</sup> ][BF <sub>4</sub> <sup>-</sup> ]               | -310             | -288  |
| [BMIM <sup>+</sup> ][PF <sub>6</sub> <sup>-</sup> ]               | -294             | -270  |
| [C <sub>6</sub> MIM <sup>+</sup> ][BF <sub>4</sub> <sup>-</sup> ] | -312             | -286  |
| [C <sub>6</sub> MIM <sup>+</sup> ][PF <sub>6</sub> <sup>-</sup> ] | -298             | -270  |

### S3.4 Ion Pair Energies

Gas-phase, ion pair energetics were computed from 200 ns NVT simulations of single ion pairs in a  $\sim 5$  nm box, using a 2 nm cutoff for both electrostatic and VDWs interactions. This cutoff is long enough to ensure all pairwise interactions within the ion pair are included, but short enough to avoid interactions between ion images. We remove both translational and rotational center of mass motion of the system. It is important to ensure equipartition of thermal energy, which is not guaranteed as there are few collisions in the gas phase. To achieve this, we use multiple thermostats for the cation degrees of freedom, implemented with the “temperature group” concept in GROMACS in which the user defines separate groups for independent temperature coupling. We find that defining groups based on atom types, e.g. for cations N1 C1 H1 C3 H3 C5, gives sufficient equipartition of energy (for example, we found poor equipartition of energy for C<sub>6</sub>MIM<sup>+</sup> using

only a single temperature group). Based on multiple simulation trajectories, we estimate the uncertainties of this data to be  $\sim 2$ -3 kJ/mol.

**Table S9: Total potential energy of gas-phase ion pair subject to temperature thermostat. The uncertainty of this data is  $\sim 2$ -3 kJ/mol.**

| Ionpair                                                           | Energy kJ/mol |       |
|-------------------------------------------------------------------|---------------|-------|
|                                                                   | 298 K         | 353 K |
| [EMIM <sup>+</sup> ][BF <sub>4</sub> <sup>-</sup> ]               | -191          | -177  |
| [EMIM <sup>+</sup> ][PF <sub>6</sub> <sup>-</sup> ]               | -162          | -147  |
| [BMIM <sup>+</sup> ][BF <sub>4</sub> <sup>-</sup> ]               | -187          | -171  |
| [BMIM <sup>+</sup> ][PF <sub>6</sub> <sup>-</sup> ]               | -163          | -144  |
| [C <sub>6</sub> MIM <sup>+</sup> ][BF <sub>4</sub> <sup>-</sup> ] | -183          | -163  |
| [C <sub>6</sub> MIM <sup>+</sup> ][PF <sub>6</sub> <sup>-</sup> ] | -163          | -142  |

### S3.5 Single Ion Energies

To compute the cohesive energy of the IL liquids, we use isolated single ions as the reference state. We compute the energies of these isolated ions at 298 K and 353 K, running a short (2 ns) simulation of the single ion, subject to a thermostat (again using separate temperature groups for different atom types, see Section S3.4). We note that the major contribution to the cation energy are the intramolecular electrostatic interactions between atoms separated by three bonds or more (closer atom pairs are excluded). This is the reason why the intramolecular potential energy decreases as the alkyl chain of the cation gets longer, EMIM<sup>+</sup> > BMIM<sup>+</sup> > C<sub>6</sub>MIM<sup>+</sup>. For the larger alkyl chain cations, the unit ion charge is slightly more spread out, reducing the intramolecular electrostatic repulsion. The bond and angle contributions to the energy do increase with increasing alkyl chain length, but this is outweighed by the electrostatic effect.

**Table S10: Total intramolecular potential energy of isolated ion subject to temperature thermostat**

| Ion                             | Energy kJ/mol |       |
|---------------------------------|---------------|-------|
|                                 | 298 K         | 353 K |
| EMIM <sup>+</sup>               | 167           | 179   |
| BMIM <sup>+</sup>               | 163           | 175   |
| C <sub>6</sub> MIM <sup>+</sup> | 156           | 168   |
| BF <sub>4</sub> <sup>-</sup>    | 14            | 18    |
| PF <sub>6</sub> <sup>-</sup>    | 20            | 25    |

### S3.6 Diffusion Coefficients

Figure S10 shows the diffusion coefficients as a function of system density for [BMIM<sup>+</sup>][BF<sub>4</sub><sup>-</sup>] at 298 K computed from the 10 different 50 ns trajectories (including the 1600 ion pair simulation). The densities are slightly different for all the systems due to the fact that the independent trajectories were started from different snapshots of the initial NPT equilibration simulation; there is  $\sim 1$  % maximum variation in the system density. This plot suggests that some of the deviation in computed diffusion coefficients, at least the largest outliers, may be explained by density differences (albeit small).

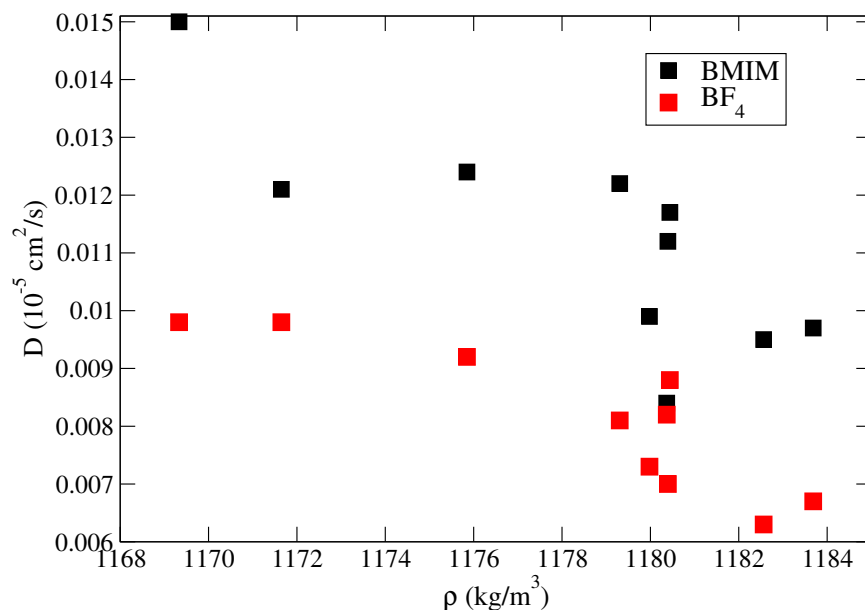

Figure S10: Diffusion coefficients for [BMIM<sup>+</sup>][BF<sub>4</sub><sup>-</sup>] at 298 K as computed from the 10 different trajectories, plotted as a function of the density of the system.
